# Supplementary material for: Inductively Coupled Nonthermal Plasma Synthesis of Size-Controlled γ-Al2O3 Nanocrystals
Source: MDPI journal article supplement (doi:10.3390/nano13101627), 2023-05-12
Supplement: s1 [file s1]

# Inductively Coupled Nonthermal Plasma Synthesis of Size-Controlled $\gamma$ -Al<sub>2</sub>O<sub>3</sub> Nanocrystals

Zichang Xiong <sup>1,†</sup>, Himashi P. Andaraarachchi <sup>1,†</sup>, Jacob T. Held <sup>2</sup>, Rick W. Dorn <sup>3</sup>, Yong-Jin Jeong <sup>1</sup>, Aaron Rossini <sup>3</sup> and Uwe R. Kortshagen <sup>1,\*</sup>

<sup>1</sup> Department of Mechanical Engineering, University of Minnesota, 111 Church Street SE, Minneapolis, MN 55455, USA; xion1832@umn.edu (Z.X.); handaraa@umn.edu (H.P.A.); yjjeong@ut.ac.kr (Y.-J.J.)

<sup>2</sup> Chemical Engineering and Materials Science Department, University of Minnesota, Minneapolis, MN 55455, USA; jaheld@ethz.ch

<sup>3</sup> Ames National Laboratory, United States Department of Energy, Department of Chemistry, Iowa State University, Ames, IA 50011, USA; rwdorn@iastate.edu (R.W.D.); arossini@iastate.edu (A.R.)

\* Correspondence: kortshagen@umn.edu

† These authors contributed equally to this work.

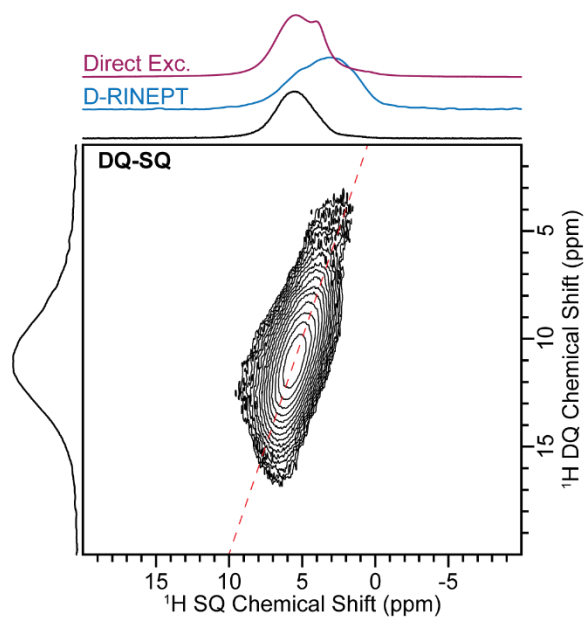

**Figure S1.** 2D  $^1\text{H}$  dipolar DQ-SQ homonuclear correlation NMR spectrum recorded with a 17.857 kHz MAS frequency and 112  $\mu\text{s}$  (i.e., two rotor cycles) of total homonuclear dipolar recoupling. Direct excitation  $^1\text{H}$  and  $^{27}\text{Al} \rightarrow ^1\text{H}$  D-RINEPT NMR spectra are overlaid above the  $^1\text{H}$  SQ projection.

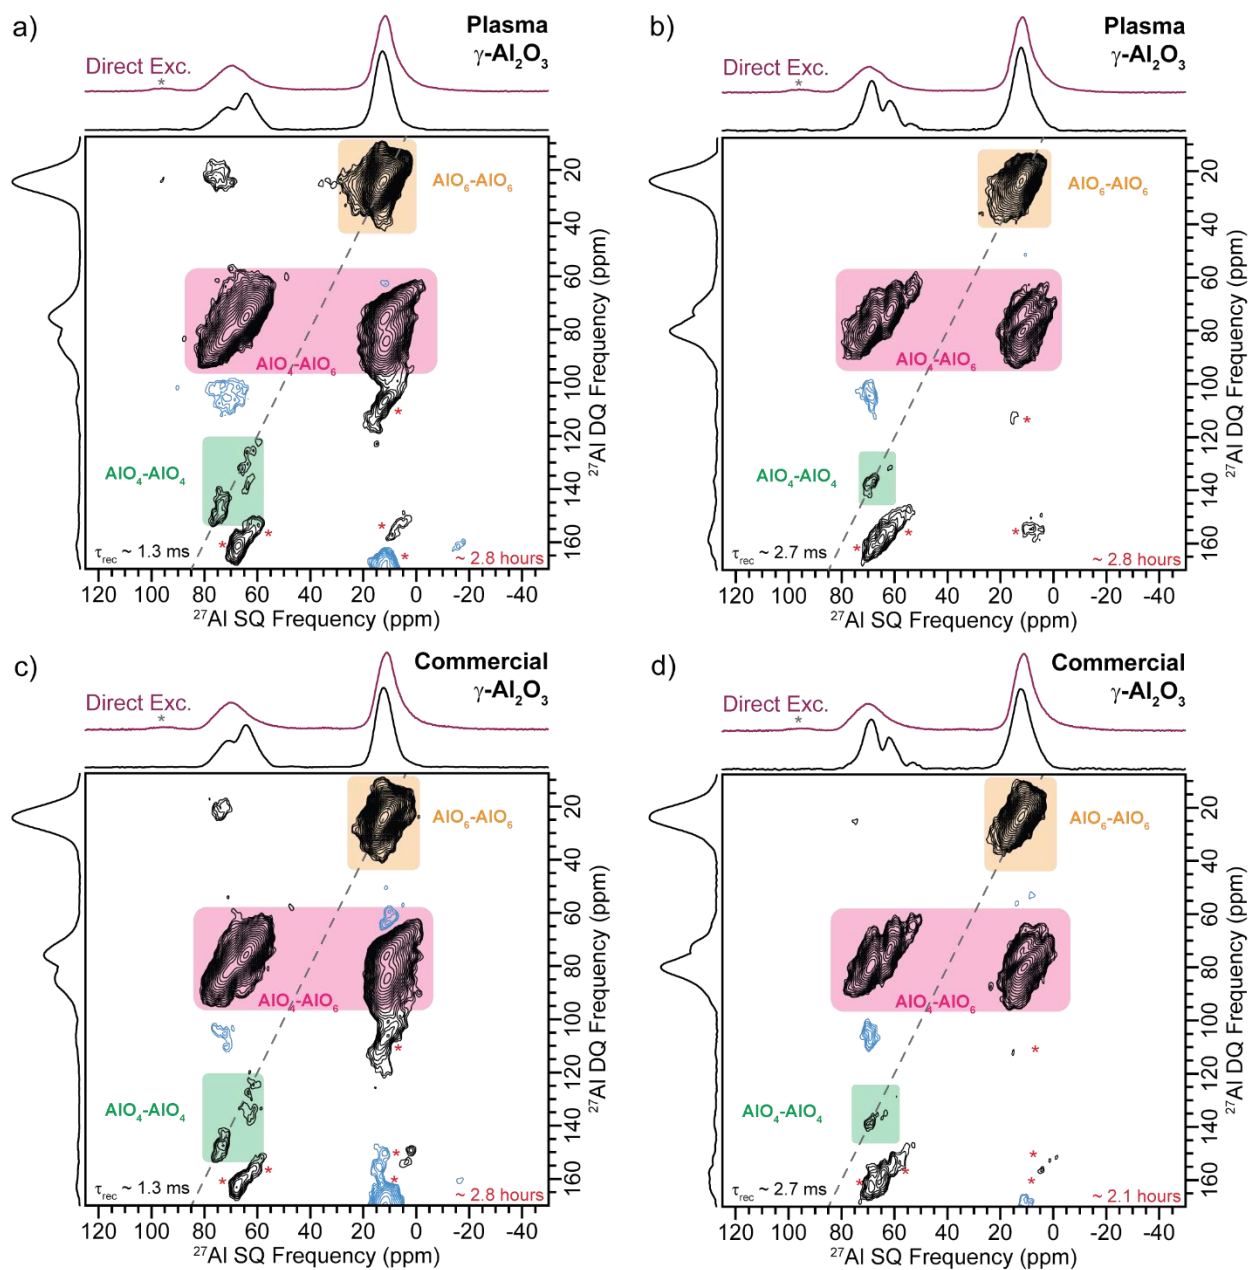

**Figure S2.** 2D  $^{27}\text{Al}$  dipolar DQ-SQ homonuclear correlation NMR spectra of (a-b) plasma synthesized gamma-alumina nanocrystals and (c-d) commercially available gamma-alumina recorded at  $B_0 = 19.52$  T with a 17.857 kHz MAS frequency and either (a, c) 1.3 ms or (b, d) 2.7 ms of total  $BR2_2^1$  homonuclear dipolar recoupling. The asterisk (\*) correspond to spinning sidebands.
